# Supplementary material for: Regulation of BMP4/Dpp retrotranslocation and signaling by deglycosylation
Source: eLife. 2020 Jul 28;9:e55596. doi: 10.7554/eLife.55596 (PMC7394544; doi:10.7554/eLife.55596)
Supplement: Figure 3—figure supplement 1—source data 1. [file elife-55596-fig3-figsupp1-data1.xlsx]

## Sheet: Sheet1
set1	pMAd	Image Name	Signal		pSMAD1/5/Actin	DMSO	2.62275	normalized	1
		DMSO	438000			Q-VD 20μM	3.28571		1.25277
		Q-VD 20μM	414000			Z-VD 20μM	1.44853		0.552293
		Z-VD 20μM	197000			Z-VD 50μM	0.338889		0.129211					DMSO			Q-VD 20			Z-VD 20			Z-VD 50
		Z-VD 50μM	48800											mean	SD	N	mean	SD	N	mean	SD	N	mean	SD	N
														1	0	3	1.14451	0.0966675	3	0.510445	0.142158	3	0.402658	0.241533	3
	actin	Image Name	Signal
		DMSO	167000								mean	SD
		Q-VD 20μM	126000							DMSO	1	0
		Z-VD 20μM	136000							Q-VD 20μM	1.14451	0.0966678
		Z-VD 50μM	144000							Z-VD 20μM	0.510445	0.142158
										Z-VD 50μM	0.402659	0.241533		Tukey's multiple comparisons test	Mean Diff.	95% CI of diff.	Significant?	Summary	Adjusted P Value
set2	pMAd	Image Name	Signal		pSMAD1/5/Actin	DMSO	1.04688	normalized	1					DMSO vs. Q-VD 20	-0.1445	-0.5321 to 0.2431	No	ns	0.647
		DMSO	268000			Q-VD 20μM	1.11684		1.06683					DMSO vs. Z-VD 20	0.4896	0.1020 to 0.8771	Yes	*	0.0157
		Q-VD 20μM	325000			Z-VD 20μM	0.656371		0.626981					DMSO vs. Z-VD 50	0.5973	0.2098 to 0.9849	Yes	**	0.005
		Z-VD 20μM	170000			Z-VD 50μM	0.514917		0.491861					Q-VD 20 vs. Z-VD 20	0.6341	0.2465 to 1.022	Yes	**	0.0035
		Z-VD 50μM	93200											Q-VD 20 vs. Z-VD 50	0.7419	0.3543 to 1.129	Yes	**	0.0013
														Z-VD 20 vs. Z-VD 50	0.1078	-0.2798 to 0.4954	No	ns	0.8101
	actin	Image Name	Signal
		DMSO	256000
		Q-VD 20μM	291000
		Z-VD 20μM	259000
		Z-VD 50μM	181000
set3	pMAd	Image Name	Signal		pSMAD1/5/Actin	DMSO	1.05627	normalized	1
		DMSO	413000			Q-VD 20μM	1.17662		1.11394
		Q-VD 20μM	473000			Z-VD 20μM	0.371869		0.35206
		Z-VD 20μM	193000			Z-VD 50μM	0.619926		0.586903
		Z-VD 50μM	168000
	actin	Image Name	Signal
		DMSO	391000
		Q-VD 20μM	402000
		Z-VD 20μM	519000
		Z-VD 50μM	271000
