# Supplementary material for: Regulation of BMP4/Dpp retrotranslocation and signaling by deglycosylation
Source: eLife. 2020 Jul 28;9:e55596. doi: 10.7554/eLife.55596 (PMC7394544; doi:10.7554/eLife.55596)
Supplement: Figure 3—source data 1. [file elife-55596-fig3-data1.xlsx]

## Sheet: Sheet1
																					pSMAD/Actin per lane
Experiment#1			WT	NGLY1	WT+BMP4	NGLY1+BMP4	WT+activeBMP4	NGLY1+Active BMP4			pSMAD/Actin per lane	WT	NGLY1	WT+BMP4	NGLY1+BMP4	WT+activeBMP4	NGLY1+Active BMP4
																														Tukey's multiple comparisons test	Mean Diff.	95% CI of diff.	Significant?	Summary	Adjusted P Value
	pSMAD		6921.49	5587.59	65678.7	5600.34	76295.2	78002.1														WT	NGLY1	WT+BMP4	NGLY1+BMP4	WT+activeBMP4	NGLY1+Active BMP4
			0.105523	0.0848325	1.32591	0.0933288	0.938058	0.948546				1	0.803926	12.5651	0.884442	8.88962	8.98901				Fold change	1	0.826213	12.2204	0.790607	10.914	10.7433			WT:None vs. WT:BMP	-11.22	-14.33 to -8.115	Yes	****	< 0.0001
	Tubulin		65592.3	65866.1	49535	60006.6	81333.1	82233.4														0	0.134078	0.667798	0.123921	2.00668	1.78539			WT:None vs. WT:Active-BMP	-9.914	-13.02 to -6.808	Yes	****	< 0.0001
																														WT:None vs. NGLY1:None	0.1738	-2.932 to 3.279	No	ns	> 0.9999
																														WT:None vs. NGLY1:BMP	0.2094	-2.896 to 3.315	No	ns	0.9999
																														WT:None vs. NGLY1:Active-BMP	-9.743	-12.85 to -6.638	Yes	****	< 0.0001
Experiment#2			WT	NGLY1	WT+BMP4	NGLY1+BMP4	WT+activeBMP4	NGLY1+Active BMP4				WT	NGLY1	WT+BMP4	NGLY1+BMP4	WT+activeBMP4	NGLY1+Active BMP4													WT:BMP vs. WT:Active-BMP	1.306	-1.799 to 4.412	No	ns	0.7196
																														WT:BMP vs. NGLY1:None	11.39	8.289 to 14.50	Yes	****	< 0.0001
	pSMAD		5285.27	3499.1	56863.7	3227.82	59213.3	53046.9																						WT:BMP vs. NGLY1:BMP	11.43	8.324 to 14.54	Yes	****	< 0.0001
			0.0766282	0.053998	0.877447	0.0498187	0.839062	0.818603				1	0.704675	11.4507	0.650134	10.9498	10.6828													WT:BMP vs. NGLY1:Active-BMP	1.477	-1.629 to 4.583	No	ns	0.6149
	Tubulin		68972.8	64800.6	64805.8	64791.4	70570.8	64801.7																						WT:Active-BMP vs. NGLY1:None	10.09	6.982 to 13.19	Yes	****	< 0.0001
																														WT:Active-BMP vs. NGLY1:BMP	10.12	7.018 to 13.23	Yes	****	< 0.0001
																														WT:Active-BMP vs. NGLY1:Active-BMP	0.1706	-2.935 to 3.276	No	ns	> 0.9999
Experiment#3			WT	NGLY1	WT+BMP4	NGLY1+BMP4	WT+activeBMP4	NGLY1+Active BMP4				WT	NGLY1	WT+BMP4	NGLY1+BMP4	WT+activeBMP4	NGLY1+Active BMP4													NGLY1:None vs. NGLY1:BMP	0.03561	-3.070 to 3.141	No	ns	> 0.9999
																														NGLY1:None vs. NGLY1:Active-BMP	-9.917	-13.02 to -6.812	Yes	****	< 0.0001
	pSMAD		4988.72	4859.72	66090.7	4001.72	65425.8	64430.7																						NGLY1:BMP vs. NGLY1:Active-BMP	-9.953	-13.06 to -6.847	Yes	****	< 0.0001
			0.070296	0.0681898	0.888923	0.058855	0.906995	0.882795				1	0.970037	12.6454	0.837246	12.9025	12.5583
	Tubulin		70967.3	71267.6	74349.2	67992.8	72134.7	72984.9
												WT	NGLY1	WT+BMP4	NGLY1+BMP4	WT+activeBMP4	NGLY1+Active BMP4
												0.111247	0.0894343	1.39783	0.0983914	0.988943	1
												0.091326	0.0643552	1.04575	0.0593742	1	0.975616
												0.0776289	0.0753029	0.98165	0.0649944	1.00161	0.974883
													WT vs NGLY1	WT vsWT+BMP4	WT+BMP4 vs NGLY1+BMP4	WT Vs WT+activeBMP4
													0.23393	0.00127457	0.00119679	1.11068e-07		0.21884
