# Supplementary material for: Regulation of BMP4/Dpp retrotranslocation and signaling by deglycosylation
Source: eLife. 2020 Jul 28;9:e55596. doi: 10.7554/eLife.55596 (PMC7394544; doi:10.7554/eLife.55596)
Supplement: Figure 4—source data 1. [file elife-55596-fig4-data1.xlsx]

## Sheet: Sheet1
1st Run	WT No BMP4		WT+BMP4		NGLY1+BMP4		NGLY1 No BMP4			Bip/Tub per lane		1st Run	WT No BMP4		WT+BMP4		NGLY1+BMP4		NGLY1 No BMP4			WT No BMP4	WT+BMP4	NGLY1+BMP4	NGLY1 No BMP4					Statistical analysis BIP
Bip	6652		18592		43761		18682															1	2.69975	5.55453	3.02751							Tukey's multiple comparisons test	Mean Diff.	95% CI of diff.	Significant?	Summary	Adjusted P Value
	0.269606		0.727871		1.49754		0.816236						1		2.69975		5.55453		3.02751			1.08165	2.56463	4.66365	2.52015					WT:-BMP vs. WT:+BMP			-1.478	-2.658 to -0.2970	Yes	*	0.0165
Tub	24673		25543		29222		22888															1.27881	2.16847	3.97684	2.39					WT:-BMP vs. NGLY1:-BMP			-1.646	-2.826 to -0.4653	Yes	**	0.009
																					Mean	1.12015	2.47762	4.73167	2.64589					WT:-BMP vs. NGLY1:+BMP			-3	-4.181 to -1.819	Yes	***	0.0002
																					SD	0.143337	0.276122	0.791042	0.336839					WT:+BMP vs. NGLY1:-BMP			-0.1683	-1.349 to 1.012	No	ns	0.9665
2nd Run	WT No BMP4		WT+BMP4		NGLY1+BMP4		NGLY1 No BMP4																							WT:+BMP vs. NGLY1:+BMP			-1.522	-2.703 to -0.3418	Yes	*	0.014
Bip	11731		27999		50768		25269						1.08165		2.56463		4.66365		2.52015											NGLY1:-BMP vs. NGLY1:+BMP			-1.354	-2.535 to -0.1735	Yes	*	0.026
	0.29162		0.747896		1.36002		0.734927
Tub	40227		37437		37329		34383
3rd Run	WT No BMP4		WT+BMP4		NGLY1+BMP4		NGLY1 No BMP4
Bip	14765		27818		48739		29339						1.27881		2.16847		3.97684		2.39
	0.344775		0.747635		1.37111		0.824013
Tub	42825		37208		35547		35605				Fold change	Mean	1.12015		2.47762		4.73167		2.64589
												SD	0.143337		0.276122		0.791042		0.336839
													WT No BMP4		WT+BMP4		NGLY1+BMP4		NGLY1 No BMP4
													1		2.69975		5.55453		3.02751
													1.08165		2.56463		4.57179		2.52015
													1.27881		2.16847		3.765		2.39
pIRE1a	3526		5471		32639		11549
	0.19706		0.32188		1.81772		0.64097
IRE1a	17893		16997		17956		18018
2nd Run	WT No BMP4		WT+BMP4		NGLY1+BMP4		NGLY1 No BMP4			pIRE1a/IREa per lane		1st Run	WT No BMP4		WT+BMP4		NGLY1+BMP4		NGLY1 No BMP4			WT No BMP4	WT+BMP4	NGLY1+BMP4	NGLY1 No BMP4					Statistical analysis pIRE1a/IRE1a
pIRE1a	3967		12544		39611		12354															1	1.63341	7.8711	3.6687							Tukey's multiple comparisons test	Mean Diff.	95% CI of diff.	Significant?	Summary	Adjusted P Value
	0.169335		0.528458		1.64163		0.512976					1st Run	1		1.63341		9.22419		3.25266			0.859303	3.12079	9.69462	3.02936					WT:-BMP vs. WT:+BMP			-1.742	-3.415 to -0.06783	Yes	*	0.0413
IRE1a	23427		23737		24129		24083															1.18967	3.51942	7.08135	3.43757					WT:-BMP vs. NGLY1:-BMP			-2.328	-4.001 to -0.6538	Yes	**	0.0083
												2nd run	0.859303		3.12079		9.69462		3.02936		Mean	1.01632	2.75788	8.66672	3.23987					WT:-BMP vs. NGLY1:+BMP			-7.312	-8.986 to -5.638	Yes	***	<0.0001
																					SD	0.165785	0.994004	1.39297	0.204404					WT:+BMP vs. NGLY1:-BMP			-0.586	-2.260 to 1.088	No	ns	0.7023
3rd Run	WT No BMP4		WT+BMP4		NGLY1+BMP4		NGLY1 No BMP4					3rd run	1.18967		3.51942		7.08135		3.43757											WT:+BMP vs. NGLY1:+BMP			-5.571	-7.244 to -3.897	Yes	***	<0.0001
pIRE1a	5415		18976		42622		19866																							NGLY1:-BMP vs. NGLY1:+BMP			4.985	3.311 to 6.658	Yes	***	<0.0001
	0.234436		0.825079		1.66012		0.80589
IRE1a	23098		22999		25674		24651					Mean	1.01632		2.75788		8.66672		3.23987
												SD	0.165785		0.994004		1.39297		0.204404
													1		1.63341		7.8711		3.6687
													0.859303		3.12079		9.69462		3.02936
													1.18967		3.51942		7.08135		3.43757
1st Run	WT No BMP4		WT+BMP4		NGLY1+BMP4		NGLY1 No BMP4
Os9(1+2)	2575		6365		17931		4521			OS/Tub per lane		1st Run	WT No BMP4		WT+BMP4		NGLY1+BMP4		NGLY1 No BMP4			WT No BMP4	WT+BMP4	NGLY1+BMP4	NGLY1 No BMP4					Statistical analysis OS9
	0.104365		0.249188		0.613613		0.197527															1	2.38765	5.87949	1.89265							Tukey's multiple comparisons test	Mean Diff.	95% CI of diff.	Significant?	Summary	Adjusted P Value
Tub	24673		25543		29222		22888					1st Run	1		2.38765		5.87949		1.89265			1.20597	1.92366	4.6347	2.1999					WT:-BMP vs. WT:+BMP			-0.9191	-1.601 to -0.2369	Yes	*	0.0101
																						1.18449	1.77253	4.97213	1.93254					WT:-BMP vs. NGLY1:-BMP			-0.8782	-1.560 to -0.1960	Yes	*	0.0132
												2nd run	1.20597		1.92366		4.6347		2.1999		Mean	1.13015	2.02795	5.1621	2.00836					WT:-BMP vs. NGLY1:+BMP			-4.032	-4.714 to -3.350	Yes	***	<0.0001
2nd Run	WT No BMP4		WT+BMP4		NGLY1+BMP4		NGLY1 No BMP4														SD	0.113225	0.320546	0.643772	0.167069					WT:+BMP vs. NGLY1:-BMP			0.04085	-0.6413 to 0.7230	No	ns	0.9975
Os9(1+2	5063		9064		21775		9520					3rd run	1.18449		1.77253		4.97213		1.93254											WT:+BMP vs. NGLY1:+BMP			-3.113	-3.795 to -2.431	Yes	***	<0.0001
	0.125861		0.242113		0.583327		0.276881																							NGLY1:-BMP vs. NGLY1:+BMP			3.154	2.472 to 3.836	Yes	***	<0.0001
Tub	40227		37437		37329		34383
												Mean	1.13015		2.02795		5.1621		2.00836
												SD	0.113225		0.320546		0.643772		0.167069
3rd Run	WT No BMP4		WT+BMP4		NGLY1+BMP4		NGLY1 No BMP4
Os9(1+2	5294		8153		21849		8506
	0.123619		0.21912		0.614651		0.238899						WT No BMP4		WT+BMP4		NGLY1+BMP4		NGLY1 No BMP4
Tub	42825		37208		35547		35605
													1		2.38765		5.87949		1.89265
													1.20597		1.92366		4.6347		2.1999
													1.18449		1.77253		4.97213		1.93254
