# Supplementary material for: Regulation of BMP4/Dpp retrotranslocation and signaling by deglycosylation
Source: eLife. 2020 Jul 28;9:e55596. doi: 10.7554/eLife.55596 (PMC7394544; doi:10.7554/eLife.55596)
Supplement: Figure 5—source data 1. [file elife-55596-fig5-data1.xlsx]

## Sheet: Sheet1
	NGLY1WT+BMP		NGLY1WT
pearson value	0.57		0.091
	0.65		0.121
	0.47		0.082
	0.35		0.071
	0.39		0.011
mean	0.486		0.0752
sd	0.124419		0.0404129	0.000110214
	NGLY1NP+BMP		NGLY1NP
	0.086		0.097
	0.141		0.088
	0.12		0.105
	0.08		0.076
	0.12		0.087
	0.1094		0.0906
	0.0256671		0.0109681	0.170469
	NGLY1GF+BMP		NGLY1GF
	0.093		0.085
	0.101		0.11
	0.09		0.13
	0.065		0.085
	0.098		0.077
mean	0.0894		0.0974
sd	0.0142934		0.0220522	0.51527
