# Supplementary material for: Regulation of BMP4/Dpp retrotranslocation and signaling by deglycosylation
Source: eLife. 2020 Jul 28;9:e55596. doi: 10.7554/eLife.55596 (PMC7394544; doi:10.7554/eLife.55596)
Supplement: Figure 6—source data 1. [file elife-55596-fig6-data1.xlsx]

## Sheet: 6C-Raw data
Exp	Strain	Reactiontime(min)	Ractiontemp	Enzyme_vol(ul)	A562	Protein_conc(ug/ul)	Product_area	Product(pmol)	Enzyme_conc(ug)	SpecificActivity(nmol/mg/10min)
1	WT	10	37	10	nd	0.072	3723	0.0886999	0.72	0.123194
1	N41P	10	37	10	nd	0.077	10252	0.244252	0.77	0.317211
1	G79AF80A	10	37	10	nd	0.088	22724	0.541396	0.88	0.615222
2	WT	10	37	10	nd	0.072	10281	0.244943	0.72	0.340199
2	N41P	10	37	10	nd	0.077	16028	0.381865	0.77	0.495928
2	G79AF80A	10	37	10	nd	0.088	31270	0.745003	0.88	0.846594
3	WT	10	37	10	nd	0.072	9155	0.218116	0.72	0.302939
3	N41P	10	37	10	nd	0.077	16496	0.393015	0.77	0.510409
3	G79AF80A	10	37	10	nd	0.088	35511	0.846044	0.88	0.961414
				WT		N41P	G79AF80A
				0.123194		0.317211	0.615222
				0.340199		0.495928	0.846594
				0.302939		0.510409	0.961414
			mean	0.255444		0.441182	0.807743
			sd	0.116037		0.107606	0.176335
			pvalue			0.0068912	0.00916798

## Sheet: 6C-One-way ANOVA against WT
Number of families	1
Number of comparisons per family	2
Alpha	0.05
Dunnett's multiple comparisons test	Mean Diff.	95.00% CI of diff.	Significant?	Summary	Adjusted P Value	A-?
WT vs. N41P	-0.1857	-0.5055 to 0.1340	No	ns	0.2421	B	N41P
WT vs. G79AF80A	-0.5523	-0.8721 to -0.2325	Yes	**	0.0047	C	G79AF80A
Test details	Mean 1	Mean 2	Mean Diff.	SE of diff.	n1	n2	q	DF
WT vs. N41P	0.2554	0.4412	-0.1857	0.1117	3	3	1.663	6
WT vs. G79AF80A	0.2554	0.8077	-0.5523	0.1117	3	3	4.945	6

## Sheet: 6E
			Glycosylated BMP4			Deglycosylated BMP4							T Test
1st run	WT		10543			53456		5.07028	mean	5.21753	SD	0.167956	0.000612815
																Ratio Glyco/Deglyco	Ratio Glyco/Deglyco +BTZ		Change in deglycosylation band
	WT+Btz		9238			65234		7.06149		7.44797		0.357584				5.07028	7.06149		1.39272
																5.18186	7.51538		1.45033
	NGLY1		52980			0										5.40046	7.76706		1.43822
																glycosylation Band (ratio/no BTZ treatment		Avarange	1.42709
	NGLY1+BTZ		52987			0										1.06512		SD	0.0247997
																1.04219			0.000612815
																1
2nd run	WT		9623			49865		5.18186							Avarange	1.03577
															SD	0.0330312
	WT+Btz		10633			79911		7.51538
	NGLY1		51298			0
	NGLY1+BTZ		54555			0
3rd run	WT		8635			46633		5.40046
	WT+Btz		8998			69888		7.76706
	NGLY1		49823
	NGLY1+BTZ		50721
