# Supplementary material for: Regulation of BMP4/Dpp retrotranslocation and signaling by deglycosylation
Source: eLife. 2020 Jul 28;9:e55596. doi: 10.7554/eLife.55596 (PMC7394544; doi:10.7554/eLife.55596)
Supplement: Figure 8—source data 1. [file elife-55596-fig8-data1.xlsx]

## Sheet: Sheet1
		PMSb1						PMSb4						PMSa7
	no BTZ		BTZ				no BTZ		BTZ				no BTZ		BTZ
WT	-5.16685		-5.68641	0.000871109	***		-5.00897		-5.73216	0.00130659	**		-4.16386		-5.78272	5.236e-05	****
	-5.19969		-5.83458				-5.05161		-5.50745				-4.22907		-5.91266
	-5.22388		-5.91484				-5.1035		-5.67331				-4.32639		-6.0545
NGLY1	-4.32469		-4.2053	0.179746	ns		-3.72028		-3.3369	0.00303222	**		-4.47824		-4.24258	0.0456652	*
	-4.30441		-4.11803				-3.80823		-3.35674				-4.50882		-4.24657
	-4.33014		-4.33156				-3.80064		-3.5012				-4.46746		-4.42825
NGLY1+WT	-5.30759		-5.60772	0.00796829	**		-5.3536		-5.77687	0.0458754	*		-4.54924		-5.85355	0.000343192	***
	-5.33048		-5.66482				-5.2722		-5.74025				-4.2842		-5.99008
	-5.46529		-5.60806				-5.58228		-5.60512				-4.08737		-5.8678
NGLY1+NP	-5.35129		-5.66385	0.00573452	**		-5.13452		-5.84498	0.000423176	***		-4.36525		-5.99194	1.0325e-05	****
	-5.20763		-5.67708				-5.03502		-5.79878				-4.33973		-5.98068
	-5.31264		-5.53596				-4.89169		-5.77873				-4.19071		-6.07711
NGLY1+GF	-5.06052		-5.63813	6.953e-05	****		-4.66955		-5.63813	5.0372e-05	****		-4.0939		-5.00779	0.00201537	**
	-5.10718		-5.70375				-4.80117		-5.70375				-4.14297		-5.38079
	-5.07092		-5.60047				-4.75533		-5.60047				-4.12735		-4.93908
